# Supplementary material
Source: PubMed Central journal article supplement (PMC4044842)
Supplement: supp_pp.114.237180_237180Supplemental_Tables_and_Figures.pdf [file supp_pp.114.237180_237180Supplemental_Tables_and_Figures.pdf]

## 1 Supplemental Tables and Supplemental Figure Legends

### 3 Supplementary Figure Legends

5 **Figure S1.** SDS-PAGE analysis showing expression and purification of recombinant  
6 glutathione transferases. Marker, molecular mass marker (kDa); Protein extract from *E. coli*  
7 culture (optical density 0.8-1 at 600 nm) prior to induction; Induced, protein extract from *E.*  
8 *coli* after 60 h expression time. Empty vector, protein extract from *E. coli* transformed with  
9 pET-YSBLIC3C.

11 **Figure S2.** Griess assays using purified GSTs to detect nitrite production. (A) Seven purified  
12 glutathione transferases (GSTs) were incubated in 100 mM phosphate buffer pH 6.5 with 5  
13 mM glutathione (GSH) and 200  $\mu$ M TNT. Nitrite levels were measured, using the Griess  
14 assay, after 24h. (B) The results were quantified using sodium nitrite standard curves, and  
15 commercially sourced (Sigma) GST from equine liver (EqGST) was used as a positive  
16 control. Results are mean of three replicate measurements  $\pm$  SD.

18 **Figure S3.** HPLC and spectrophotometric analysis of GSH-TNT conjugates. HPLC  
19 chromatogram showing the three TNT-GSH conjugation products formed at pH 9.5 by (A)  
20 GST-U24 and (B) GST-U25. Samples were analyzed at 250 nm. (C) Absorption spectra and  
21 absorption maxima of the GSH-TNT conjugates.

23 **Figure S4.** Change in TNT conjugating activity of glutathione transferases (GSTs) with  
24 increasing temperature. (A) GST-U24, (B) GST-U25. Assays, containing 100 mM phosphate  
25 buffer pH 9.0, 150  $\mu$ g GST, 5 mM glutathione, 200  $\mu$ M TNT in a total volume of 250  $\mu$ l,  
26 were performed for 1 hour. Results are mean of three replicate measurements  $\pm$  SD.

28 **Figure S5.** Lineweaver-Burk double reciprocal plots for (A) GST-U24 and (B) GST-U25.  
29 The reaction mix contained 50 mM Tris-HCl, pH 6.5, 0.5 mM EDTA, 5 mM GSH, 0.25 mM  
30 NADPH, 0.6 unit/ml glutathione reductase, 2.5-10  $\mu$ M TNT and 5 and 30  $\mu$ g of enzyme for  
31 GST-U25 and GST-U24 respectively in a final volume of 190  $\mu$ l. The reaction was initiated

32 by the addition of cumene hydroperoxide and glutathione peroxidase activity monitored  
33 spectrophotometrically using an NADPH-linked assay. Results are mean of three technical  
34 replica  $\pm$  SD.

35

36 **Figure S6.** Conjugation activity in protein extracts from Arabidopsis rosette leaves using 1-  
37 chloro-2,4,-dinitrobenzene substrate. Wild type (WT), GST-U24 and GST-U25  
38 overexpressing lines, results are mean of three biological replica  $\pm$  SD.

39

40 **Figure S7.** Rate of TNT uptake and TNT-conjugate formation by Arabidopsis in liquid  
41 culture. Three-week-old wild type (WT), (A) GST-U24 and (B) GST-U25 overexpressing  
42 Arabidopsis lines were grown in flasks containing  $\frac{1}{2}$  MS, 20 mM sucrose and 200 mM TNT.  
43 NPC, no plant control. Results are mean of five biological replica  $\pm$  SE. (C) Levels of TNT-  
44 conjugates in the tissues of plants after one day. Results are mean of three biological replica  $\pm$   
45 SD.

46 **Supplemental Table I**

47 Root surface area of GST-U24 overexpressing lines relative to wild type. Plants were grown  
 48 vertically on agar plates containing ½ MS medium plus a range of TNT concentrations. Each  
 49 ratio is derived from the mean of three replicate plates containing 12-15 seedlings per plate.

50

| Age of seedlings<br>(days after<br>germination) | TNT conc <sup>n</sup><br>in the agar<br><br>(µM) | Root surface area<br>relative to wild type at the same concentration and time point |      |      |      |      |      |      |
|-------------------------------------------------|--------------------------------------------------|-------------------------------------------------------------------------------------|------|------|------|------|------|------|
|                                                 |                                                  | GST-U24 overexpression lines                                                        |      |      |      |      |      |      |
|                                                 |                                                  | 1                                                                                   | 2    | 3    | 4    | 5    | 6    | 7    |
| 9 days                                          | 2                                                | 1.04                                                                                | 1.62 | 1.04 | 1.16 | 1.24 | 1.39 | 1.17 |
|                                                 | 7                                                | 1.08                                                                                | 1.13 | 1.18 | 1.45 | 1.31 | 1.27 | 1.18 |
|                                                 | 15                                               | 1.10                                                                                | 1.07 | 1.24 | 1.15 | 1.16 | 0.94 | 1.16 |
| 14 days                                         | 2                                                | 1.20                                                                                | 1.40 | 1.00 | 1.18 | 1.49 | 1.70 | 1.44 |
|                                                 | 7                                                | 1.10                                                                                | 1.40 | 1.77 | 1.74 | 2.03 | 2.37 | 2.04 |
|                                                 | 15                                               | 2.49                                                                                | 2.01 | 2.95 | 1.33 | 2.49 | 1.31 | 2.17 |
| 20 days                                         | 2                                                | 1.34                                                                                | 1.23 | 0.91 | 1.26 | 1.08 | 1.22 | 1.27 |
|                                                 | 7                                                | 1.44                                                                                | 1.22 | 1.45 | 1.41 | 1.45 | 1.61 | 1.63 |
|                                                 | 15                                               | 2.40                                                                                | 2.04 | 2.37 | 1.93 | 1.95 | 1.26 | 1.93 |

51

52

53

54 **Supplemental Table II**

55 Root surface area of GST-U25 overexpressing lines relative to wild type. Plants were grown  
 56 vertically on agar plates containing ½ MS medium plus a range of TNT concentrations. Each  
 57 ratio is derived from the mean of three replicate plates containing 12-15 seedlings per plate.

58

| Age of seedlings<br>(days after<br>germination) | TNT conc <sup>n</sup><br>in the agar<br><br>(µM) | Root surface area<br>relative to wild type at the same concentration and time point |      |      |      |      |      |      |
|-------------------------------------------------|--------------------------------------------------|-------------------------------------------------------------------------------------|------|------|------|------|------|------|
|                                                 |                                                  | GST-U25 overexpression lines                                                        |      |      |      |      |      |      |
|                                                 |                                                  | 1                                                                                   | 2    | 3    | 4    | 5    | 6    | 7    |
| 9 days                                          | 2                                                | 0.84                                                                                | 0.63 | 1.10 | 0.79 | 1.26 | 0.89 | 1.13 |
|                                                 | 7                                                | 0.84                                                                                | 0.84 | 1.29 | 1.11 | 1.49 | 1.26 | 1.02 |
|                                                 | 15                                               | 1.24                                                                                | 1.12 | 1.35 | 1.49 | 1.52 | 1.20 | 1.20 |
| 14 days                                         | 2                                                | 1.05                                                                                | 0.61 | 1.12 | 1.05 | 1.54 | 1.11 | 1.24 |
|                                                 | 7                                                | 0.85                                                                                | 0.46 | 1.30 | 1.16 | 1.74 | 1.64 | 0.88 |
|                                                 | 15                                               | 1.18                                                                                | 0.69 | 1.24 | 1.03 | 1.38 | 1.17 | 0.60 |
| 20 days                                         | 2                                                | 2.18                                                                                | 1.55 | 1.54 | 1.61 | 1.55 | 1.46 | 1.80 |
|                                                 | 7                                                | 1.39                                                                                | 2.17 | 1.84 | 1.48 | 1.73 | 1.54 | 2.21 |
|                                                 | 15                                               | 3.34                                                                                | 1.84 | 2.66 | 2.28 | 3.04 | 2.18 | 2.01 |

59

60

61 **Supplemental Table III**

62 Primer sequences used during cloning of GSTs for expression in *E. coli* and Arabidopsis.  
 63 Regions in italics are the Ligation Independent Cloning-specific overhangs for cloning into  
 64 pET YSBLIC (Bonsor et al., 2006). Regions in bold represent enzyme restriction sites used to  
 65 clone into pART7 (Gleave, 1992).

| <b>Primer name</b> | <b>Sequence (5' to 3')</b>                                 |
|--------------------|------------------------------------------------------------|
| GSTU1LICF          | <i>CCAGGGACCAGCAATGGCGGAGAAAGAAGAGAGTGTGAAG</i>            |
| GSTU1LICR          | <i>GAGGAGAAGGCGCGTTAGGCAGACTTAATTGTCTCTGCAATTTTGGT</i>     |
| GSTU3LICF          | <i>CCAGGGACCAGCAATGGCCGAGAAAGAAGAGGGTGTGAA</i>             |
| GSTU3LICR          | <i>GAGGAGAAGGCGCGTTAGACCGCTTTGATTCGTCCTACAATTTTCAT</i>     |
| GSTU4LICF          | <i>CCAGGGACCAGCAATGGCGGAGAAAGAAGAGGATGTGAAG</i>            |
| GSTU4LICR          | <i>GAGGAGAAGGCGCGTTAGGCTGATTTGATTCTTTCTACAACCTTCTTC</i>    |
| GSTU7LICF          | <i>CCAGGGACCAGCAATGGCGGAGAGATCAAATTCAGAGGAAG</i>           |
| GSTU7LICR          | <i>GAGGAGAAGGCGCGTTATCAAGCAGATTTGATATTGAGTTTCTCCATACG</i>  |
| GSTU12LICF         | <i>CCAGGGACCAGCAATGGCTCAAATGGTTCGAATACTACTGTG</i>          |
| GSTU12LICR         | <i>GAGGAGAAGGCGCGTTACTAAACACTGAATTTCTTTTTGGCAAACCTCGAT</i> |
| GSTU22LICF         | <i>CCAGGGACCAGCAATGGCGGATGAAGTGATACTTTTGGATTTTTG</i>       |
| GSTU22LICR         | <i>GAGGAGAAGGCGCGTTAGACACAGTATATCTTCCTAATCTTATAGGC</i>     |
| GSTU24LICF         | <i>CCAGGGACCAGCAATGGCAGATGAGGTGATTCTTCTGGATTTC</i>         |
| GSTU24LICR         | <i>GAGGAGAAGGCGCGTTACTCCAACCCAAGTTTCTTCCTACGTTC</i>        |
| GSTU25LICF         | <i>CCAGGGACCAGCAATGGCAGACGAGGTGATTCTTCTTGATTTC</i>         |
| GSTU25LICR         | <i>GAGGAGAAGGCGCGTTACTATTCGATTTTCGATCCCAAGTTTTTTCCTTAG</i> |
| GSTU1F             | <b>GAATTC</b> ATGGCGGAGAAAGAAGAGAG                         |
| GSTU1R             | <b>GGATCC</b> TTAGGCAGACTTAATTGTC                          |

|         |                                    |
|---------|------------------------------------|
| GSTU1F  | <b>GAATTCATGGCGGAGAAAGAAGAGAG</b>  |
| GSTU1R  | <b>GGATCCTTAGGCAGACTTAATTGTC</b>   |
| GSTU3F  | <b>GAATTCATGGCCGAGAAAGAAGAGG</b>   |
| GSTU3R  | <b>GGATCCTTAGACCGCTTTGATTC</b>     |
| GSTU3R  | <b>GGATCCTTAGACCGCTTTGATTC</b>     |
| GSTU4F  | <b>GAATTCATGGCGGAGAAAGAAGAGG</b>   |
| GSTU4R  | <b>GGATCCTTAGGCTGATTTGATTC</b>     |
| GSTU7F  | <b>GAATTCATGGCGGAGAGATCAA</b>      |
| GSTU7R  | <b>GGATCCTCAAGCAGATTTGATATTG</b>   |
| GSTU22F | <b>GAATTCATGGCGGATGAAGTG</b>       |
| GSTU22R | <b>GGATCCTTAGACACAGTATATCTTCC</b>  |
| GSTU24F | <b>GGTACCATGGCAGATGAGGTGATTCTT</b> |
| GSTU24R | <b>TCTAGATTACTCCAACCCAAGTTTGTT</b> |
| GSTU25R | <b>GGATCCCTATTCGATTTGATCC</b>      |
| GSTU25F | <b>GAATTCATGGCAGACGAGGTGA</b>      |

67

68 **Supplemental Table IV**

69 Primer sequences used for qPCR of GSTs in Arabidopsis.

70

| <b>Primer name</b> | <b>Sequence (5' to 3')</b> |
|--------------------|----------------------------|
| RTU1F              | CGTGCCATACGAATACTTGGAA     |
| RTU1R              | TTCTTGTGAAGCGGGTTTAGC      |
| RTU3F              | ACCAAACATGGACAAACAATCCT    |
| RTU3R              | CGACAAATTTGGCCCAGAA        |
| RTU4F              | AAGCCCTTTTACTCGTAGAGTTGAGA |
| RTU4R              | TTTGTAGACAAGAACCGGAACCTT   |
| RTU7F              | TCCGGTTCTTGTTCATAATGGTA    |
| RTU7R              | TCATCGACGAATTTAGACCAGAAT   |
| RTU22F             | TCGAAGCATCAGAGAACTAGCTAAC  |
| RTU22R             | CCTCTTAGCCGAAGCCATCA       |
| RTU24F             | TCCCTCCGATCCTTACAAGAGA     |
| RTU24R             | TCGCCGTAACATTCACCTTTT      |
| RTU25F             | TGTCAAATTCGATTACAGAGAACAAG |
| RTU25R             | GGTATTTTCTTATGAACCGGATTCA  |

71

72

73

74

75

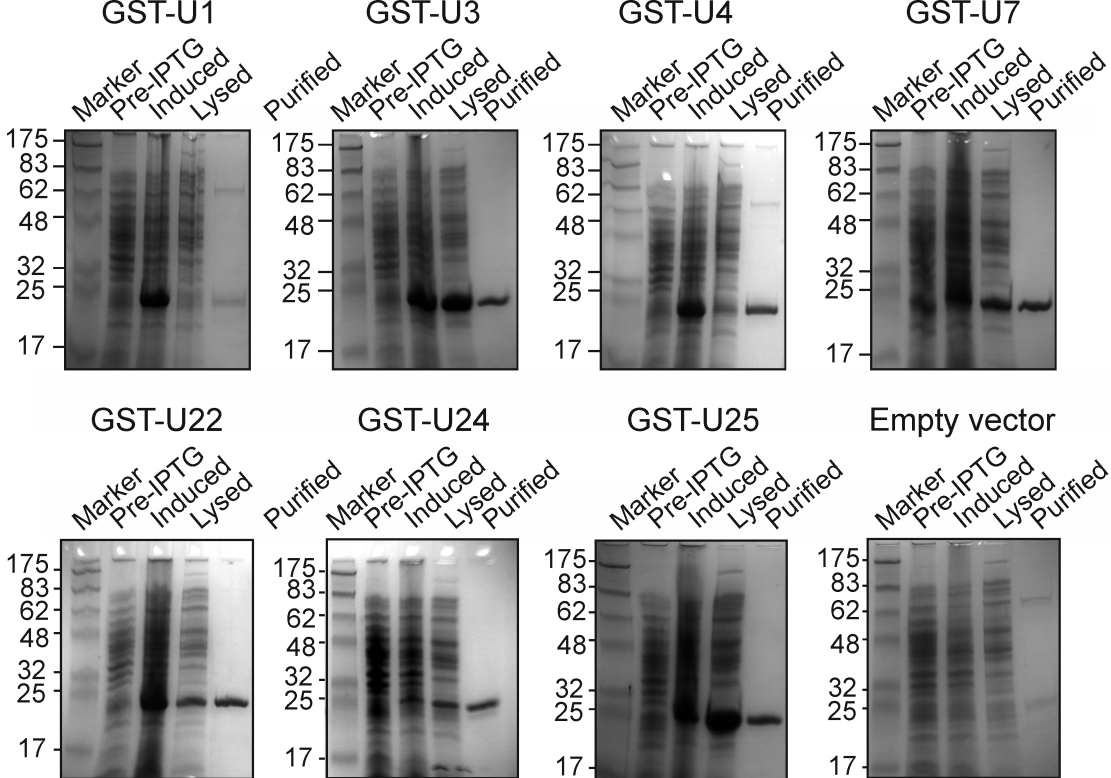

**Figure S1.** SDS-PAGE analysis showing expression and purification of recombinant glutathione transferases. Marker, molecular mass marker (kDa); Protein extract from *E. coli* culture (optical density 0.8-1 at 600 nm) prior to induction; Induced, protein extract from *E. coli* after 60 h expression time. Empty vector, protein extract from *E. coli* transformed with pET-YSBLIC3C.



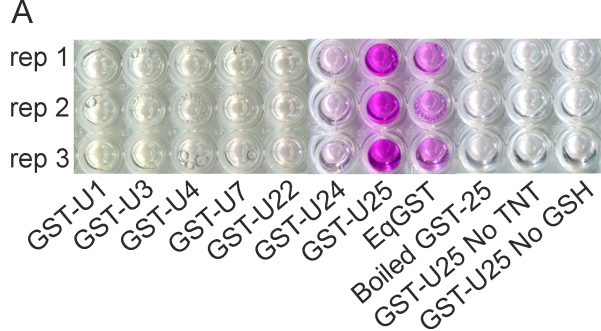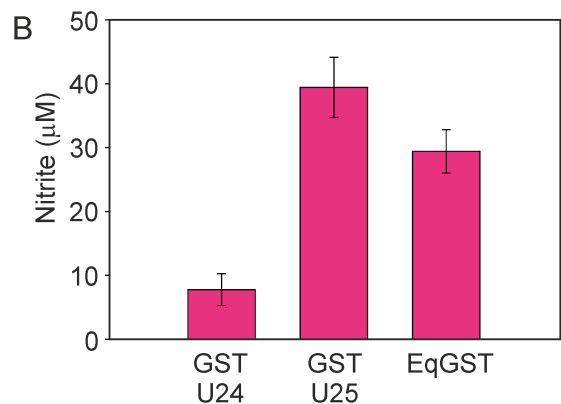

**Figure S2.** Griess assays using purified GSTs to detect nitrite production. (A) Seven purified glutathione transferases (GSTs) were incubated in 100 mM phosphate buffer pH 6.5 with 5 mM glutathione (GSH) and 200  $\mu\text{M}$  TNT. Nitrite levels were measured, using the Griess assay, after 24h. (B) The results were quantified using sodium nitrite standard curves, and commercially sourced (Sigma) GST from equine liver (EqGST) was used as a positive control. Results are mean of three replicate measurements  $\pm$  SD.

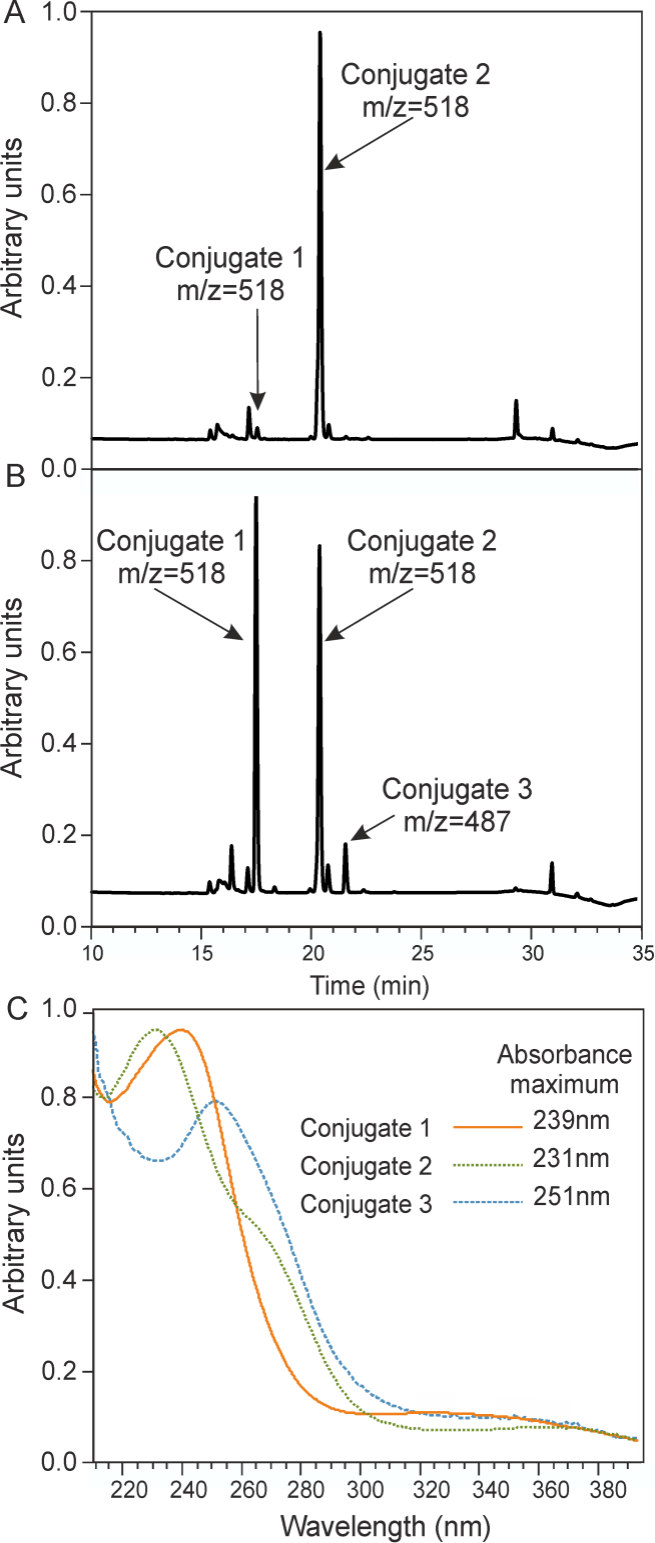

**Figure S3.** HPLC and spectrophotometric analysis of GSH-TNT conjugates. HPLC chromatogram showing the three TNT-GSH conjugation products formed at pH 9.5 by (A) GST-U24 and (B) GST-U25. Samples were analyzed at 250 nm. (C) Absorption spectra and absorption maxima of the GSH-TNT conjugates.

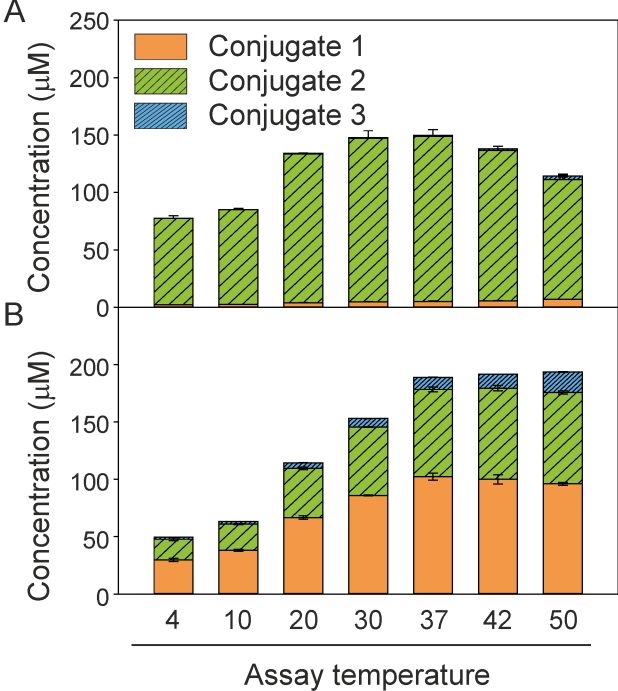

**Figure S4.** Change in TNT conjugating activity of glutathione transferases (GSTs) with increasing temperature. (A) GST-U24, (B) GST-U25. Assays, containing 100 mM phosphate buffer pH 9.0, 150  $\mu\text{g}$  GST, 5 mM glutathione, 200  $\mu\text{M}$  TNT in a total volume of 250  $\mu\text{l}$ , were performed for 1 hour. Results are mean of three replicate measurements  $\pm$  SD.

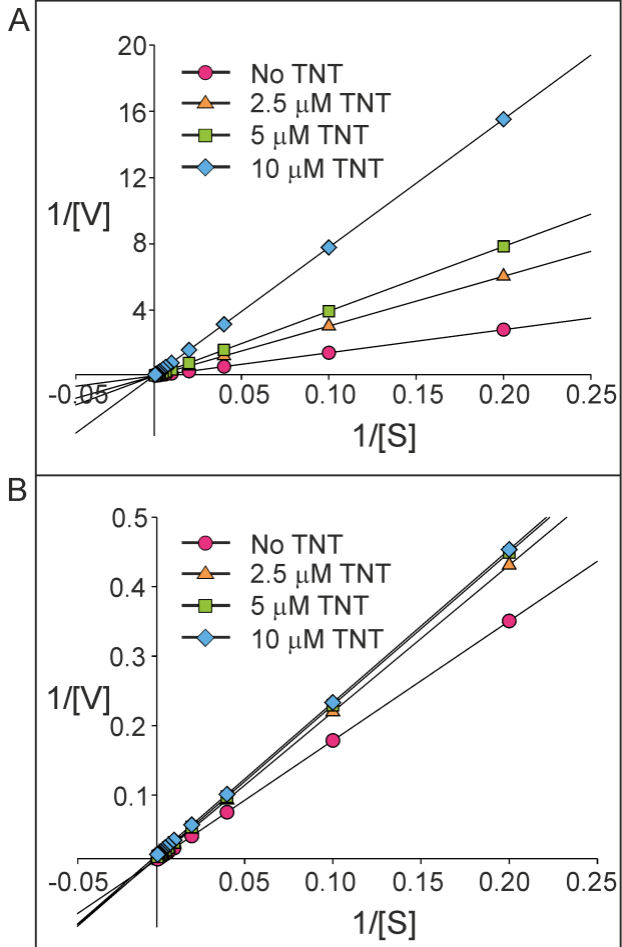

**Figure S5.** Lineweaver-Burk double reciprocal plots for (A) GST-U24 and (B) GST-U25. The reaction mix contained 50 mM Tris-HCl, pH 6.5, 0.5 mM EDTA, 5 mM GSH, 0.25 mM NADPH, 0.6 unit/ml glutathione reductase, 2.5-10  $\mu$ M TNT and 5 and 30  $\mu$ g of enzyme for GST-U25 and GST-U24 respectively in a final volume of 190  $\mu$ l. The reaction was initiated by the addition of cumene hydroperoxide and glutathione peroxidase activity monitored spectrophotometrically using an NADPH-linked assay. Results are mean of three technical replica  $\pm$  SD.

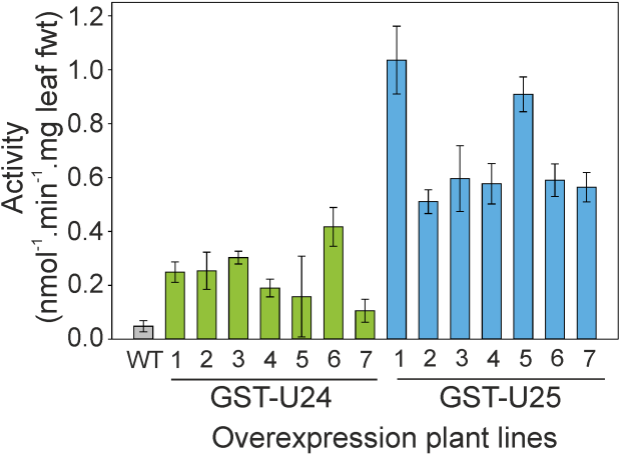

**Figure S6.** Conjugation activity in protein extracts from Arabidopsis rosette leaves using 1-chloro-2,4,-dinitrobenzene substrate. Wild type (WT), GST-U24 and GST-U25 overexpressing lines, results are mean of three biological replica  $\pm$  SD.

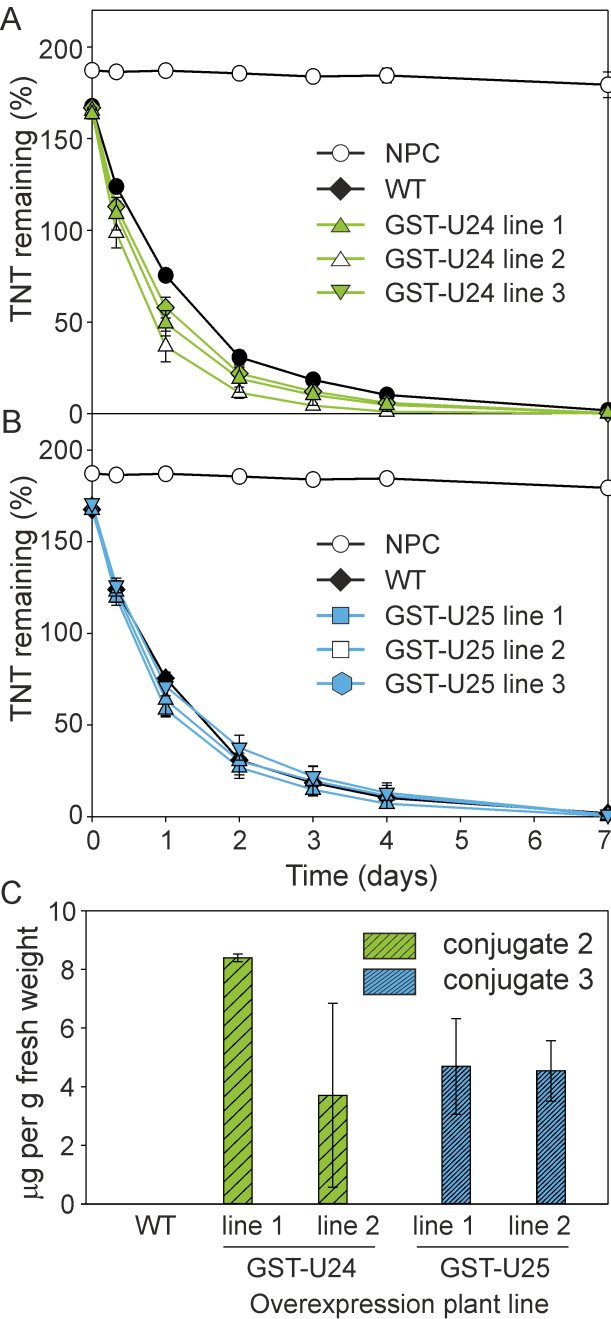

**Figure S7.** Rate of TNT uptake and TNT-conjugate formation by *Arabidopsis* in liquid culture. Three-week-old wild type (WT), (A) GST-U24 and (B) GST-U25 overexpressing *Arabidopsis* lines were grown in flasks containing  $\frac{1}{2}$  MS, 20 mM sucrose and 200 mM TNT. NPC, no plant control. Results are mean of five biological replica  $\pm$  SE. (C) Levels of TNT-conjugates in the tissues of plants after one day. Results are mean of three biological replica  $\pm$  SD.
